# Supplementary material
Source: PubMed Central journal article supplement (PMC3759994)
Supplement: NIHMS493718-supplement-1.pdf [file NIHMS493718-supplement-1.pdf]

# Regulation of Tcf711 DNA Binding and Protein Stability as Principal Mechanisms of Wnt/ $\beta$ -Catenin Signaling

Brian R. Shy,<sup>1,4</sup> Chun-I. Wu,<sup>1,4</sup> Galina F. Khramtsova,<sup>2</sup> Jenny Y. Zhang,<sup>1</sup> Olufunmilayo I. Olopade,<sup>2</sup> Kathleen H. Goss,<sup>3</sup> and Bradley J. Merrill<sup>1,\*</sup>

<sup>1</sup>Department of Biochemistry and Molecular Genetics, University of Illinois at Chicago, Chicago, IL 60607, USA

<sup>2</sup>Department of Medicine, University of Chicago, Chicago, IL 60637, USA

<sup>3</sup>Department of Surgery, University of Chicago, Chicago, IL 60637, USA

<sup>4</sup>These authors contributed equally to this work as co-first authors

\*Correspondence: [merrillb@uic.edu](mailto:merrillb@uic.edu)

<http://dx.doi.org/10.1016/j.celrep.2013.06.001>

This is an open-access article distributed under the terms of the Creative Commons Attribution-NonCommercial-No Derivative Works License, which permits non-commercial use, distribution, and reproduction in any medium, provided the original author and source are credited.

## SUMMARY

Wnt/ $\beta$ -catenin signal transduction requires direct binding of  $\beta$ -catenin to Tcf/Lef proteins, an event that is classically associated with stimulating transcription by recruiting coactivators. This molecular cascade plays critical roles throughout embryonic development and normal postnatal life by affecting stem cell characteristics and tumor formation. Here, we show that this pathway utilizes a fundamentally different mechanism to regulate Tcf711 (formerly named Tcf3) activity.  $\beta$ -catenin inactivates Tcf711 without a switch to a coactivator complex by removing it from DNA, which leads to Tcf711 protein degradation. Mouse genetic experiments demonstrate that Tcf711 inactivation is the only required effect of the Tcf711- $\beta$ -catenin interaction. Given the expression of Tcf711 in pluripotent embryonic and adult stem cells, as well as in poorly differentiated breast cancer, these findings provide mechanistic insights into the regulation of pluripotency and the role of Wnt/ $\beta$ -catenin in breast cancer.

## INTRODUCTION

Canonical Wnt/ $\beta$ -catenin signaling impacts a wide range of biological activities, including stem cell self-renewal, organ morphogenesis, and tumor formation (Clevers and Nusse, 2012; Nusse, 2012). Regulation of the pathway centers on the stability of  $\beta$ -catenin, which is targeted for proteasome-mediated degradation by a complex containing adenomatous polyposis coli (APC), Axin structural proteins, and glycogen synthase kinase 3 (GSK3) (Stamos and Weis, 2013). Phosphorylation of  $\beta$ -catenin by GSK3 stimulates degradation dependent upon APC, Axin, and the  $\beta$ -TrCP E3 ligase (Aberle et al., 1997; Hart et al., 1999; Yost et al., 1996). Wnt signaling inhibits degradation of  $\beta$ -catenin by blocking its ubiquitination (Li et al., 2012). Pharmacological

GSK3 inhibitors similarly inhibit  $\beta$ -catenin degradation by blocking  $\beta$ -catenin phosphorylation.

An important downstream mechanism of the Wnt/ $\beta$ -catenin pathway occurs as  $\beta$ -catenin binds to the amino terminal of Tcf/Lef proteins, thereby displacing corepressor proteins bound to the Tcf/Lef (Cavallo et al., 1998; Daniels and Weis, 2005; Roose et al., 1998). Tcf- $\beta$ -catenin binding subsequently recruits transactivator proteins to the genomic sites that were previously occupied by corepressors (Brannon et al., 1997; Molenaar et al., 1996; van de Wetering et al., 1997). This accepted model of canonical Wnt/ $\beta$ -catenin signaling is consistent with observed effects of Tcf/Lef proteins in many contexts (Cadigan and Waterman, 2012); however, it is not consistent with recent observations for mammalian Tcf711 (formerly Tcf3). In cells where Lef1 and Tcf7 (formerly Tcf1) act as  $\beta$ -catenin-dependent transactivators, only transcriptional repressor activity for Tcf711 was detected (Merrill et al., 2001; Wu et al., 2012a). Here, we show that  $\beta$ -catenin binding to Tcf711 does not form a transactivation complex, but instead initiates a fundamentally distinct mechanism.  $\beta$ -catenin binding inactivates Tcf711 by reducing its chromatin occupancy and secondarily stimulates its protein degradation. Mouse genetic experiments demonstrate that this inactivation is the only necessary function of the Tcf711- $\beta$ -catenin interaction. These molecular and genetic findings provide insights into the role of Wnt/ $\beta$ -catenin signaling in cells where Tcf711 expression is prominent, including embryonic stem cells (ESCs) and poorly differentiated breast cancer.

## RESULTS

### $\beta$ -Catenin Reduces Tcf711 Protein Levels by Stimulating Protein Degradation

Molecular support for a conversion into transactivators by  $\beta$ -catenin includes the ability of a  $\beta$ -catenin-Tcf7 fusion protein to activate target genes without Wnt pathway stimulation (Staal et al., 1999). If Tcf711 were switched to a transactivator by  $\beta$ -catenin, one would expect a  $\beta$ -catenin-Tcf711 fusion protein to similarly activate target genes. In ESCs, the  $\beta$ -catenin-Tcf711 fusion was

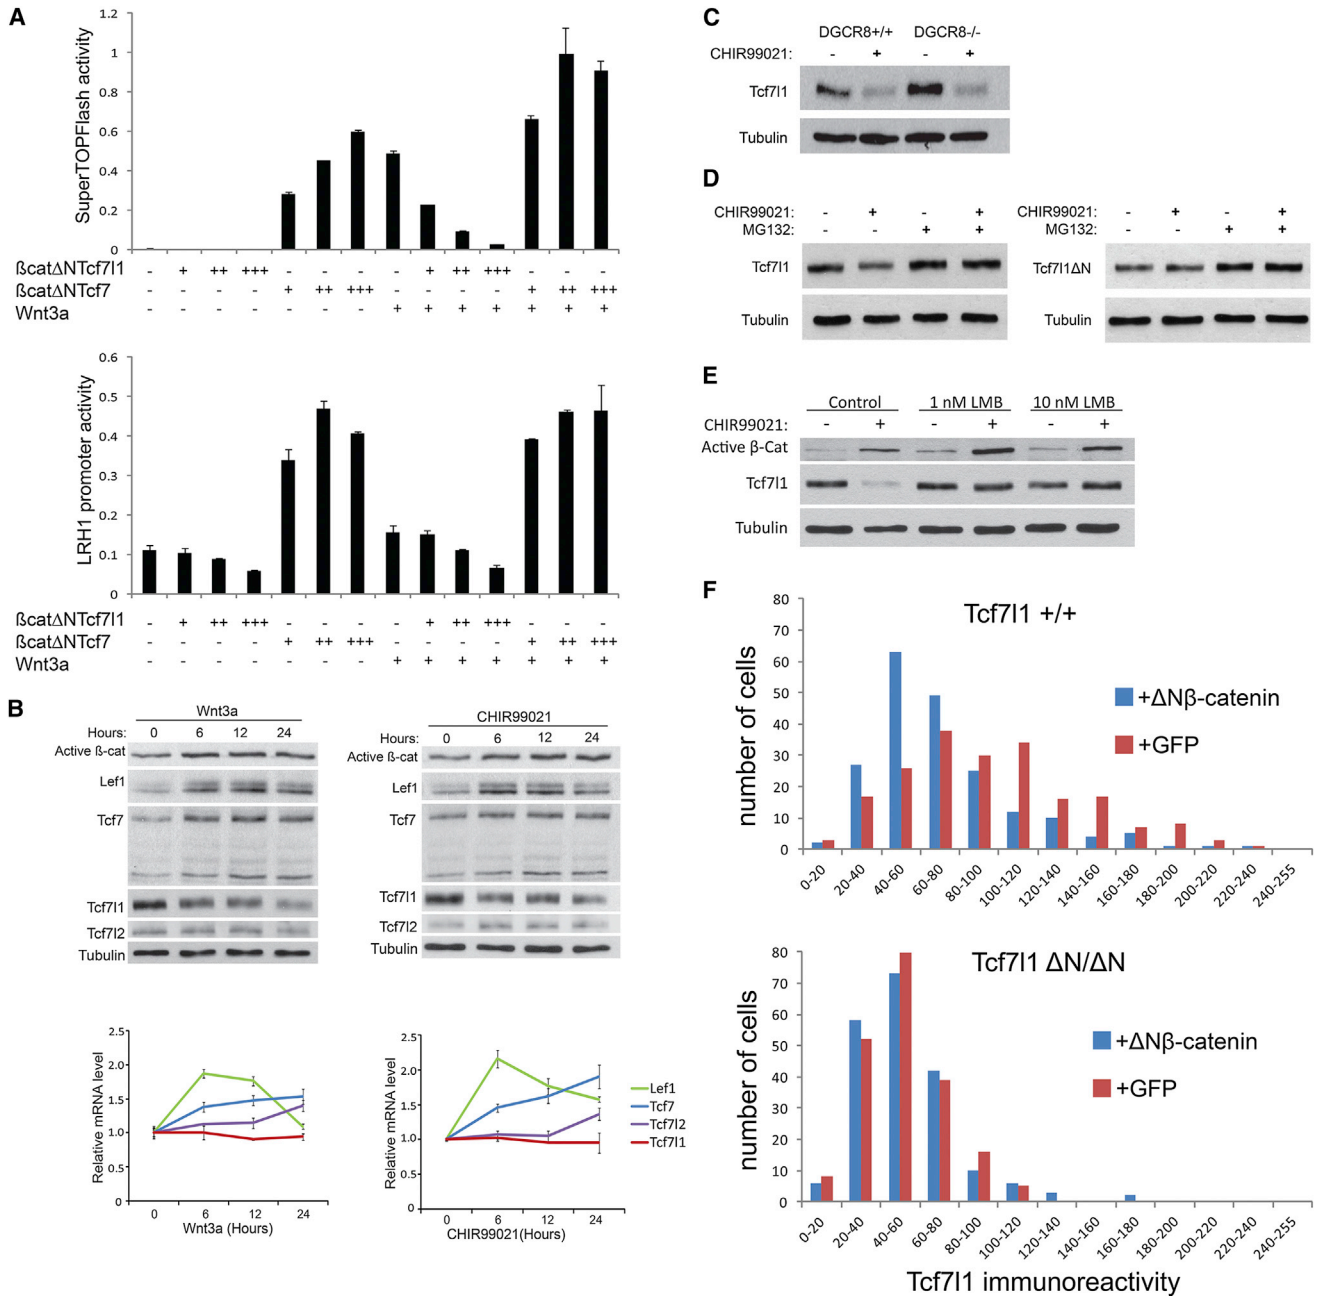

**Figure 1. Wnt/β-Catenin Stimulates Tcf711 Protein Degradation**

(A) Transient transfection of *Tcf711*<sup>-/-</sup> ESCs with β-catenin-Tcf fusion plasmids and SuperTOPFlash (top) or LRH1 promoter (bottom) luciferase reporter plasmids. Values represent mean ± SD for triplicate transfections.

(B) Western blot (top) and quantitative RT-PCR (qRT-PCR, bottom) analyses of ESCs treated with 50 ng/ml recombinant Wnt3a (left) or 3 μM CHIR (right). Values represent mean ± SD for biological triplicates.

(C–E) Western blot analysis of ESCs treated with 3 μM CHIR for 24 hr in *Dgcr8* mutant cells (C), for 6 hr with MG-132 (5 μM) in *Tcf711*<sup>+/+</sup> and *Tcf711*ΔN/ΔN cells (D), and for 12 hr with leptomycin B (E).

(F) Distribution of nuclear Tcf711 immunoreactivity levels in *Tcf711*<sup>+/+</sup> (top) and *Tcf711*ΔN/ΔN (bottom) cells expressing either GFP (red bars) or ΔNβ-catenin (blue bars). A total of 200 nuclei were counted for each condition. Data are representative of three separate experiments.

See also Figure S1.

unable to activate TOPFlash and LRH-1 reporters, and instead repressed Wnt3a-stimulation of reporter genes (Figure 1A). Rather than converting Tcf711 to a transactivator, Wnt/β-catenin

stimulation notably decreased Tcf711 protein in ESCs treated with recombinant Wnt3a or the GSK3 inhibitor, Chiron99021 (CHIR; Figure 1B). These results indicate a significant difference

in the downstream effects of Tcf7- $\beta$ -catenin and Tcf711- $\beta$ -catenin interaction.

To elucidate the transactivation-independent effects of  $\beta$ -catenin on Tcf711, we investigated how Tcf711 protein levels were reduced. Wnt3a- and CHIR-treated ESCs displayed increased *Lef1* and *Tcf7* messenger RNA (mRNA) levels that correlated with increased protein levels (Figure 1B), consistent with *Lef1* and *Tcf7* being Wnt/ $\beta$ -catenin target genes (Filali et al., 2002; Hovanes et al., 2000; Roose et al., 1999; Waterman, 2004). In contrast, decreased Tcf711 protein was not paralleled by a significant change in mRNA levels (Figure 1B), indicating that  $\beta$ -catenin regulation of Tcf711 does not occur transcriptionally. Because Dgcr8 is a required component of the microprocessor complex, which is necessary for biogenesis of microRNAs (Wang et al., 2007), the CHIR-stimulated reduction of Tcf711 in *Dgcr8*<sup>-/-</sup> ESCs showed that reduction of Tcf711 protein was also not microRNA mediated (Figure 1C). Treatments with the proteasome inhibitors MG-132 and MG-115 effectively blocked the CHIR-stimulated reduction of Tcf711 protein (Figures 1D and S1A), demonstrating that reduction of Tcf711 required protein degradation. Finally, reduction of Tcf711 was blocked by leptomycin B, indicating that it required Exportin1-mediated nuclear transport (Figure 1E).

To determine the role of  $\beta$ -catenin binding to Tcf711, we used *Tcf711* $\Delta N/\Delta N$  knockin ESCs. In contrast to wild-type Tcf711, Tcf711 $\Delta N$  was not degraded in response to CHIR or Wnt3a (Figures 1D and S1B), indicating that the Tcf711- $\beta$ -catenin interaction was necessary for degradation. To determine whether the interaction was sufficient for degradation, we expressed  $\Delta N\beta$ -catenin in ESCs and measured the Tcf711 levels by quantitative immunofluorescence.  $\Delta N\beta$ -catenin expression was sufficient to reduce nuclear Tcf711 levels in *Tcf711*<sup>+/+</sup> but not in *Tcf711* $\Delta N/\Delta N$  cells (Figures 1F and S1C). Interestingly, several recent studies showed that a mutant form of  $\beta$ -catenin ( $\beta$ -catenin $\Delta C$ ) supported self-renewal of mouse ESCs and complemented defects caused by ablation of  $\beta$ -catenin despite the lack of the C-terminal transactivation domain in the  $\beta$ -catenin $\Delta C$  mutant (Kelly et al., 2011; Lyashenko et al., 2011; Wray et al., 2011). Therefore, it is notable that expression of  $\Delta N\beta$ -catenin $\Delta C$  was also sufficient to reduce nuclear Tcf711 protein levels ESCs (Figure S1D). Given the substantial effects of altering Tcf711 levels in ESCs, the reduction of Tcf711 protein provides a mechanism for the poorly understood pro-self-renewal effects of  $\beta$ -catenin $\Delta C$  in ESCs.

### Reduction of Tcf711 Is Sufficient to Replace the Tcf711- $\beta$ -Catenin Interaction

If a principal mechanism of Wnt/ $\beta$ -catenin signaling functions through inactivation of Tcf711, and not conversion to a Tcf711- $\beta$ -catenin transactivator complex, reducing the level of Tcf711 should be sufficient to replace the Tcf711- $\beta$ -catenin interaction. We first tested this hypothesis in ESCs, where reducing the amount of Tcf711 $\Delta N$  by small interfering RNA (siRNA) stimulated the reporter gene response to Wnt3a (Figures S2A and S2B). To examine the broader effects of reducing Tcf711 in mice, we reduced the level of Tcf711 by breeding for hemizygous mice (i.e., *Tcf711*<sup>+/-</sup> or *Tcf711*<sup>-/\Delta N</sup>; Figure S2C). It is important to note that *Tcf711*<sup>-/-</sup> mice die shortly after gastrulation (Merrill et al., 2004). *Tcf711* $\Delta N/\Delta N$  embryos progress normally through

gastrulation, but later develop a constellation of morphogenetic defects that result in death for all *Tcf711* $\Delta N/\Delta N$  mice at or before birth (Hoffman et al., 2013; Wu et al., 2012a). Mating *Tcf711*<sup>+/-</sup> with *Tcf711*<sup>+/\Delta N</sup> mice produced the Mendelian-expected ratio of *Tcf711*<sup>-/\Delta N</sup> offspring, despite the genetic absence of a Tcf711 protein capable of interacting with  $\beta$ -catenin (Figures 2A and S2D). Moreover, *Tcf711*<sup>-/\Delta N</sup> mice did not display any of the morphogenetic defects observed in *Tcf711* $\Delta N/\Delta N$  mice, including poor vascular integrity, edema, oligodactyly, and opened eyelids (Figures 2C–2D", S2E, and S2F). Indeed, *Tcf711*<sup>-/\Delta N</sup> mice advanced to adulthood and appeared indistinguishable from *Tcf711*<sup>+/+</sup> littermates throughout their ostensibly normal lifetimes (Figure 2B). Thus, removing one copy of *Tcf711* $\Delta N$  genetically rescued the defects caused by ablating the Tcf711- $\beta$ -catenin interaction. These results demonstrate that inactivation of Tcf711 by  $\beta$ -catenin is the necessary effect downstream of Tcf711- $\beta$ -catenin interaction for mouse embryogenesis and postnatal viability.

To determine the effects of reducing Tcf711 at the target gene level in mice, tissues that were previously shown to be affected in *Tcf711* $\Delta N/\Delta N$  embryos were examined in *Tcf711*<sup>-/\Delta N</sup> embryos harboring the BAT-Gal reporter. Compared with *Tcf711*<sup>+/+</sup> embryonic day 14.5 (e14.5) eyelids (Figures 2E–E''), *Tcf711* $\Delta N/\Delta N$  displayed a restricted domain of BAT-Gal activity and decreased expression of *Lef1*, a Wnt/ $\beta$ -catenin target, in the mucocutaneous junction of the eyelid (Figures 2F–2F'''; Wu et al., 2012a). The domain of *Lef1* expression and BAT-Gal activity was increased in *Tcf711*<sup>-/\Delta N</sup> relative to *Tcf711* $\Delta N/\Delta N$ , and BAT-Gal activity was detected only in cells expressing *Lef1* (Figures 2F–2G'', S2G, and S2H). Given the inability of Tcf711 $\Delta N$  to respond to  $\beta$ -catenin, the rescue of BAT-Gal activity in *Tcf711*<sup>-/\Delta N</sup> embryos shows that activation is mediated by *Lef1*, and attenuation of this activation depends on the level of Tcf711 repressor.

### $\beta$ -Catenin Stimulates TCF7L1 Inactivation in Human Breast Cancer

In addition to pluripotent cells in the early mammalian embryo, and ESCs in vitro, *TCF7L1* mRNA expression has been noted in several types of adult stem cells and in poorly differentiated cancers (Ben-Porath et al., 2008; Ivanova et al., 2002; Tumber et al., 2004). We reasoned that the aspects of the Tcf711-destabilization mechanism could provide insights into the effects of Wnt/ $\beta$ -catenin in these important contexts. Breast cancer was chosen for further analysis because (1) Wnt/ $\beta$ -catenin has been known to affect mammary tumors since it was first discovered by Nusse et al. (1984), (2) despite its long history, the underlying mechanisms of Wnt/ $\beta$ -catenin's effects in this disease remain poorly understood (Alexander et al., 2012), (3) poorly differentiated mammary tumors express high levels of *TCF7L1* mRNA (0.81 mean *TCF7L1* mRNA  $\pm$  0.91 SD for 270 basal tumors,  $-0.32 \pm 0.67$  for 941 nonbasal tumors;  $p < 0.0001$ ; Figure 3A; Ben-Porath et al., 2008), and (4) altering the level of Tcf711 caused significant effects in xenograft tumor-formation experiments (Slyper et al., 2012).

Consistent with previous analyses, we noted a very high frequency of the basal molecular subtype among invasive mammary tumors expressing the highest levels of *TCF7L1* mRNA (83% of tumors with *TCF7L1* mRNA  $> 1.1$  were basal, and 22%



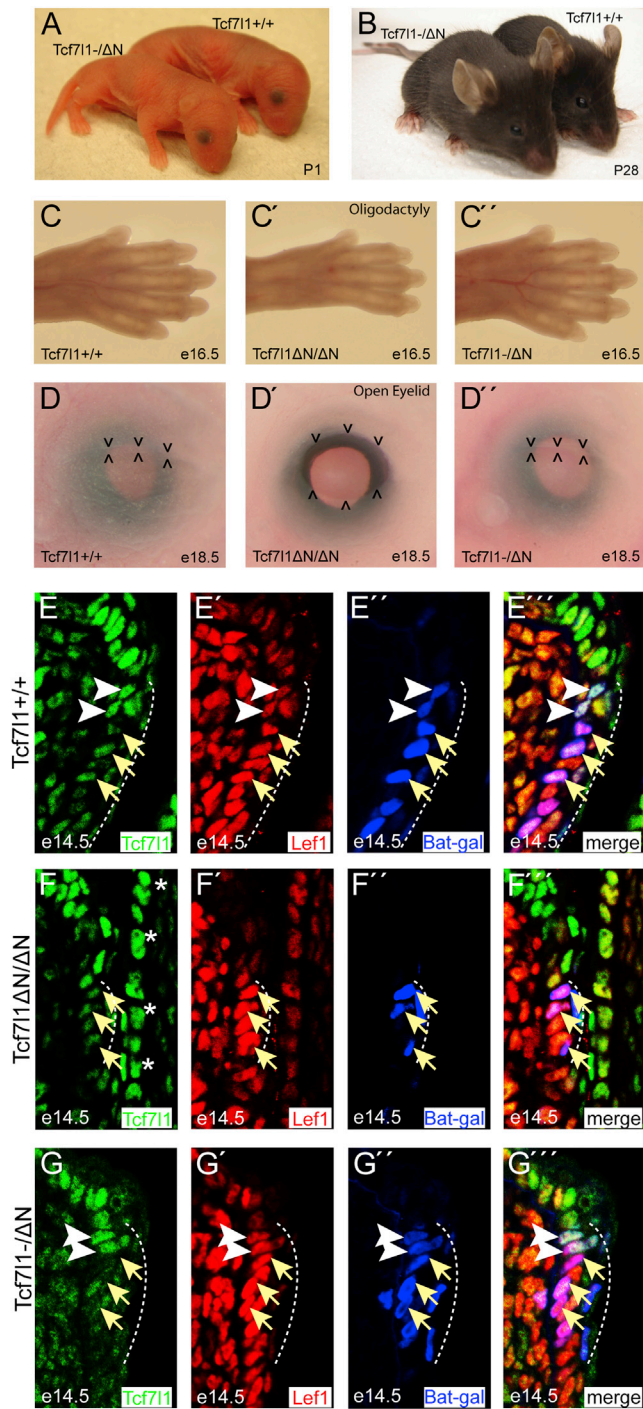

**Figure 2. Reducing *Tcf7l1* Levels Replaces the Requirement for  $\beta$ -Catenin Interaction in Mice**

(A–D'') *Tcf7l1*<sup>-/ $\Delta$ N</sup> mice appear normal at birth (A) and through adult stages (B; see also Figure S2D). *Tcf7l1*<sup>-/ $\Delta$ N</sup> embryos do not develop the phenotypes observed in *Tcf7l1* $\Delta$ N/ $\Delta$ N embryos (i.e., oligodactyly [C–C'] and opened eyelids at birth [D–D'']; see also Figures S2E and S2F).

(E–G'') *Tcf*/*Lef*- $\beta$ -catenin activation of BAT-Gal reporter is restored in the *Tcf7l1*<sup>-/ $\Delta$ N</sup> eyelid. Immunofluorescent staining for *Tcf7l1* (green), *Lef1* (red), and  $\beta$ -galactosidase (blue) in e14.5 eyelids from BAT-Gal transgenics with the indicated *Tcf7l1* genotype. Arrows point to *Lef1*-high and *Tcf7l1*-low nuclei.

of all tumors assessed were basal; Figure 3A; Ben-Porath et al., 2008; Slyper et al., 2012). To examine patterns of TCF7L1 protein expression, we used a TCF7L1-specific antibody for immunohistochemistry (IHC) staining of an array of breast cancer tissue samples (Figure S3A; Khramtsov et al., 2010). In contrast to *TCF7L1* mRNA, nuclear TCF7L1 protein was not significantly higher in basal subtype tumors ( $55 \pm 60$ ,  $n = 23$ ) relative to non-basal tumors ( $44 \pm 74$ ,  $n = 47$ ; Figures 3B and S3A), and the frequency of basal tumors displaying strong nuclear TCF7L1 (i.e., nuclear IHC score  $> 180$ ) was lower than the overall frequency of basal tumors on the array (25% with high nuclear TCF7L1 versus 32% of all tumors; Figures 3C, S3B, and S3C). Thus, although *TCF7L1* mRNA is highly elevated in basal subtype tumors, TCF7L1 protein is not.

Previous analyses of  $\beta$ -catenin protein in patient samples demonstrated that nuclear and cytoplasmic  $\beta$ -catenin was strongly associated with basal subtype tumors and poor prognosis (Geyer et al., 2011; Khramtsov et al., 2010; López-Knowles et al., 2010). To determine whether the disparity between *TCF7L1* mRNA and protein levels could be caused by elevated  $\beta$ -catenin, we compared the TCF7L1 IHC results with the  $\beta$ -catenin IHC results among identical patient samples. Remarkably, tumors with strong nuclear TCF7L1 had predominantly no nuclear or cytoplasmic  $\beta$ -catenin ( $\beta$ -catenin IHC score of 0; Figure 3D), and tumors with cytoplasmic and/or nuclear  $\beta$ -catenin ( $\beta$ -catenin IHC score of 2 or 3) displayed predominantly diffuse or low levels of TCF7L1 protein (Figure 3D). These data indicate that in human mammary tumors, stimulation of Wnt/ $\beta$ -catenin is strongly correlated with decreased nuclear TCF7L1.

To test for a causal relationship between  $\beta$ -catenin and TCF7L1 levels in breast cancer, we used several cancer cell lines. Endogenous TCF7L1 protein was reduced by CHIR in all cells examined (MCF7, MDA-MB-231, MDA-MB-468, HS578T, and HCC38; Figure 3E). As in the ESCs, *TCF7L1* mRNA was not significantly diminished (Figure S3E), and the reduction of TCF7L1 protein was blocked by the proteasome inhibitor MG-132 (Figure S3F). Treating cells with CHIR or CHIR + MG-132 increased the cytoplasmic levels of TCF7L1 detected by immunofluorescence (Figure S3G). As in the ESCs, *Tcf7* was endogenously expressed and stimulated TOPFlash activity (Figures 3F and S3H), whereas overexpression of *Tcf7l1* or  $\beta$ -catenin-*Tcf7l1* fusion repressed TOPFlash activity (Figures 3F and 3G). Repression by *Tcf7l1* $\Delta$ N and *Tcf7l1* HMG\* mutants indicated that inhibition of TOPFlash was caused by a combination of  $\beta$ -catenin-binding- and DNA-binding-dependent activities of *Tcf7l1* (Figure S3I). These results suggest that the mechanism of  $\beta$ -catenin-mediated inactivation of *Tcf7l1* that was previously observed in ESCs and mouse embryos also occurs in human breast cancer.

### Tcf7l1 Inactivation Occurs Independently of Phosphorylation by HIPK2 or NLK

Treating human breast cancer cells with CHIR caused a substantial shift in the mobility of TCF7L1 as analyzed by SDS-PAGE

Arrowheads point to *Lef1*-high and *Tcf7l1*-positive nuclei. The dotted line denotes the BAT-Gal-positive region. Asterisks mark *Tcf7l1*-positive cells in the nearby cornea.

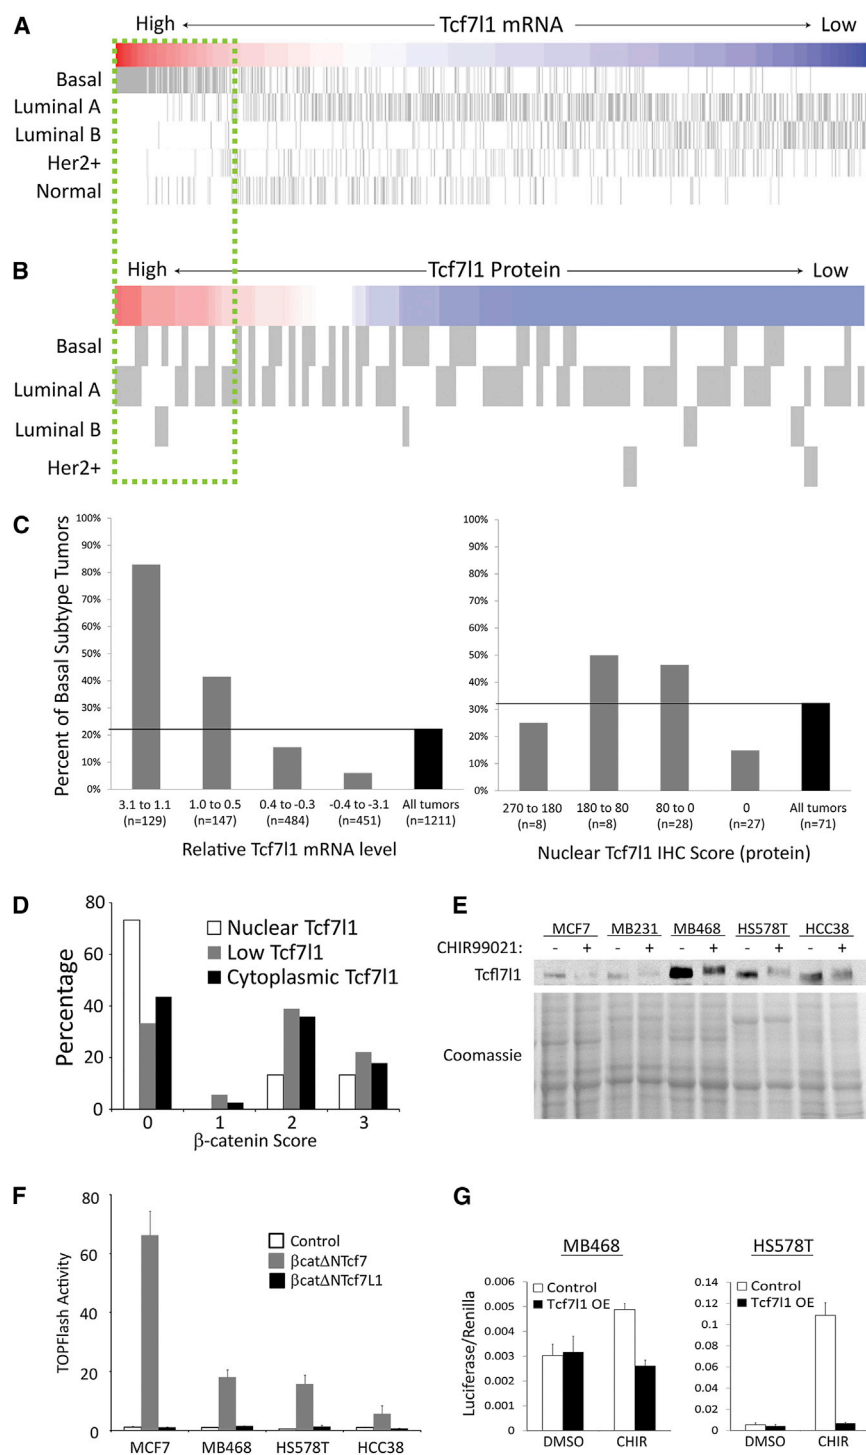

**Figure 3. Wnt/ $\beta$ -Catenin Inactivates TCF7L1 Protein in Poorly Differentiated Breast Cancer**

(A) Heatmap showing relative *TCF7L1* mRNA levels and tumor subtype status from a compendium of 1,211 mammary tumors. Subtypes are displayed according to previous designations (Ben-Porath et al., 2008).

(B) Heatmap showing relative TCF7L1 protein nuclear immunoreactivity for all invasive tumors in an array of samples from 71 individual patients. Subtypes are displayed as determined previously (Khramtsov et al., 2010).

(C) Graphs show the distribution of basal subtype with respect to the level of *TCF7L1* mRNA (left) or nuclear TCF7L1 protein (right).

(D) Distribution of tumors with nuclear TCF7L1 (n = 15, white), diffuse TCF7L1 (n = 38, black), or low TCF7L1 (n = 18, gray) classification relative to the IHC score for cytoplasmic  $\beta$ -catenin for each individual tumor. Values represent the percentage of tumors for each TCF7L1 classification displaying the indicated cytoplasmic  $\beta$ -catenin IHC score.

(E) TCF7L1 protein (western) and total protein (Coomassie) for human breast cancer cell lines treated with vehicle (DMSO) or CHIR (3  $\mu$ M) for 12 hr.

(F and G) SuperTOPFlash luciferase reporter activity for breast cancer cell lines transiently transfected with the indicated  $\beta$ -catenin-Tcf fusion plasmid, wild-type Tcf7l1 plasmid, or empty vector. Values represent mean  $\pm$  SD of technical duplicates of biological duplicates.

See also Figure S3.

of Tcf7l1/Tcf3 proteins by homeodomain-interacting protein kinase 2 (HipK2) (Hikasa et al., 2010; Hikasa and Sokol, 2011) and nemo-like kinase (NLK) (Ishitani et al., 1999, 2003). In particular, HipK2 has been proposed to serve as a primary mediator of Tcf7l1 regulation by reducing chromatin binding after phosphorylation at conserved residues (Hikasa et al., 2010; Hikasa and Sokol, 2011). We previously showed that Tcf7l1 chromatin occupancy is reduced in ESCs by Wnt3a, and the reduction required the Tcf7l1- $\beta$ -catenin interaction (Wu et al., 2012a). Therefore, we tested whether phosphorylation of Tcf7l1 at conserved residues was needed for inactivation by using the Tcf7l1-P2/3/4 mutant, which harbors mutations at the

(Figure 3E). Although it is more difficult to detect in mouse ESCs, likely because of the multiple Tcf7l1 isoforms expressed in ESCs (Salomonis et al., 2010), this shift also affected endogenous Tcf7l1 in mouse ESCs treated with CHIR or Wnt3a (Figures 4A, 4B, and S4). Interestingly, work in other systems demonstrated mobility shifts caused by  $\beta$ -catenin-dependent phosphorylation

residues phosphorylated by HipK2 and NLK (Hikasa et al., 2010). Surprisingly, the Tcf7l1-P2/3/4 mutation did not affect CHIR-induced degradation of Tcf7l1 or Tcf7l1 repression of target gene expression in ESCs (Figures 4C and 4D). Thus, it is unlikely that Wnt/ $\beta$ -catenin inactivation of Tcf7l1 in ESC requires phosphorylation by HipK2 or NLK. In addition, although Tcf7l1

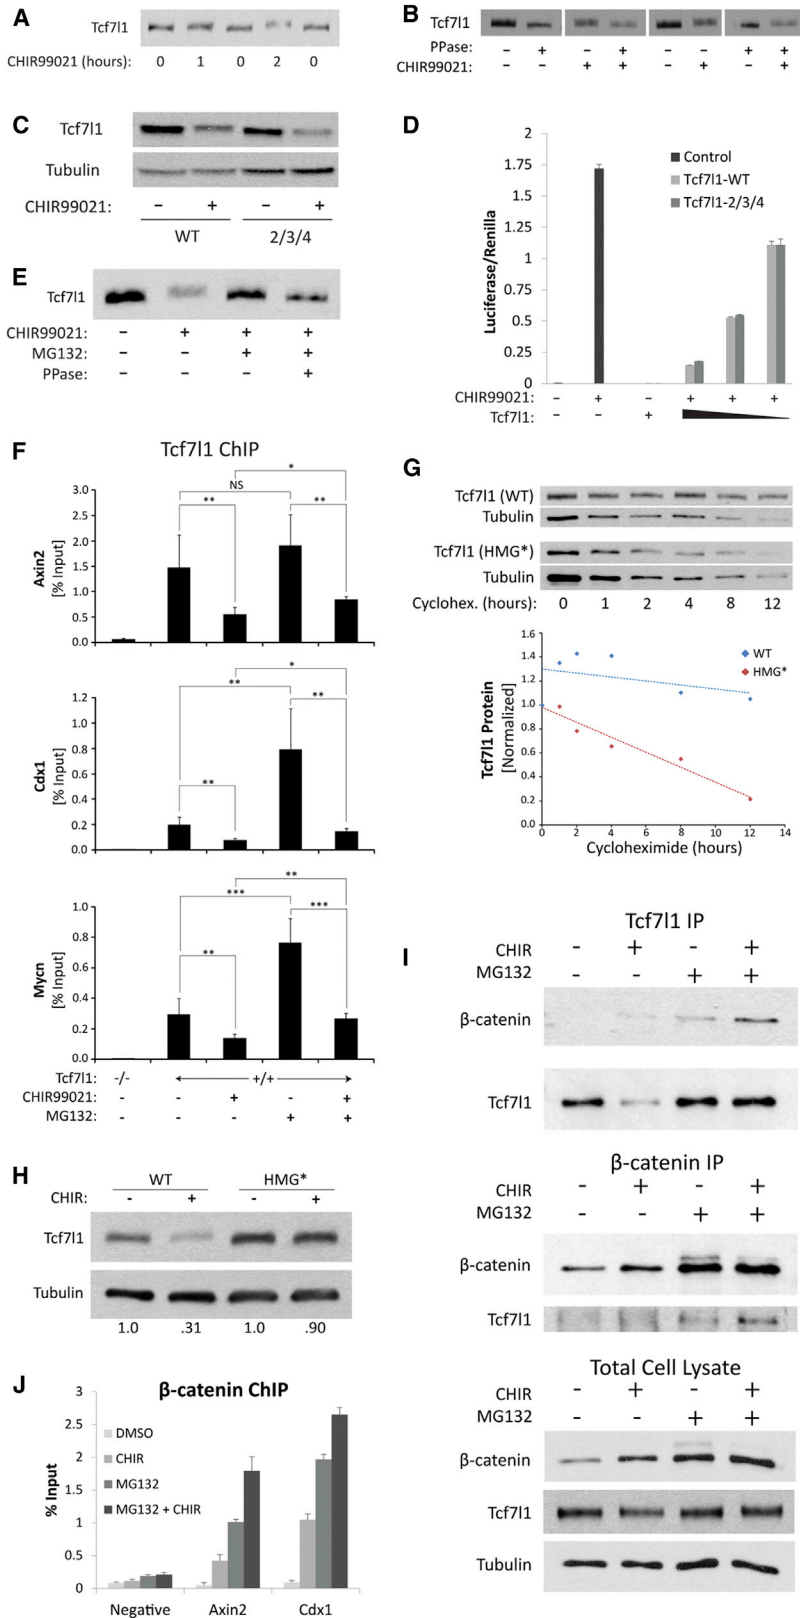

**Figure 4. Inhibition of Chromatin Occupancy Is Upstream of Tcf7l1 Protein Degradation**

(A and B) Western blot analysis of Tcf7l1 protein from ESCs.

(A) Cells were treated with 15  $\mu$ M CHIR for 0–2 hr.

(B) Cells were treated with 3  $\mu$ M CHIR for 12 hr and lysates were treated with 15 U/ $\mu$ L lambda phosphatase.

(C) Tcf7l1 protein from *Tcf7l1*<sup>-/-</sup> ESC stably expressing either Tcf7l1-wild-type (Tcf7l1-WT) or Tcf7l1-2/3/4. Cells were treated with 6  $\mu$ M CHIR for 18 hr.

(D) SuperTOPFlash assay using *Tcf7l1*<sup>-/-</sup> ESC transiently transfected with either Tcf7l1-WT or Tcf7l1-2/3/4. Cells were treated with 3  $\mu$ M CHIR for 12 hr. Values represent mean  $\pm$  SD of technical duplicates of biological replicates.

(E) Tcf7l1 protein from lysates of *Tcf7l1*<sup>-/-</sup> ESC stably expressing wild-type Tcf7l1. Cells were treated with 3  $\mu$ M CHIR and 5  $\mu$ M MG-132 for 12 hr. Lysates were treated with 15 U/ $\mu$ L lambda phosphatase.

(F) Quantitative ChIP using anti-Tcf7l1 antibody. Mouse ESCs were treated for 12 hr with 3  $\mu$ M CHIR and/or 5  $\mu$ M MG-132. qPCR measurements of Tcf7l1-bound DNA are shown for regions near *Axin2*, *Cdx1*, and *Mycn* genes. Values represent the mean + SD of percent of precipitated DNA relative to input for duplicate technical measurements of five biological replicates. \*\**p* < 0.01; \*\*\**p* < 0.001; NS, *p* > 0.05.

(G) Top: Tcf7l1 and Tubulin proteins from lysates of *Tcf7l1*<sup>-/-</sup> ESC stably expressing either wild-type Tcf7l1 (WT) or the mutant Tcf7l1 HMG\* (HMG\*) protein. Cells were treated with 30  $\mu$ g/ml cycloheximide. Bottom: quantitation of western blot and normalization of Tcf7l1 protein levels was calculated for WT (blue) and HMG\* (red) proteins. Each data point represents the mean of biological triplicates.

(H) Western blot analysis comparing the CHIR-mediated reduction WT and HMG\* Tcf7l1 proteins using the same ESCs as in (G).

(I) CoIP experiments using anti-Tcf7l1 (top) or anti- $\beta$ -catenin (middle). Protein was immunoprecipitated from lysates of cells treated with 3  $\mu$ M CHIR and 5  $\mu$ M MG-132 (bottom).

(J) Quantitative ChIP using anti- $\beta$ -catenin antibody. Chromatin was isolated from ESCs treated for 12 hr with 3  $\mu$ M CHIR and 5  $\mu$ M MG-132. qPCR measurements of  $\beta$ -catenin-bound DNA are shown for regions near *Axin2* and *Cdx1* genes. Values represent the mean + SD of percent of precipitated DNA relative to input for duplicate technical measurements of three biological replicates.

See also Figure S4.



was indeed phosphorylated, we detected no change in phosphorylation in the absence or presence of CHIR stimulation. The CHIR-induced mobility shift of Tcf711 was not phosphatase sensitive, suggesting that it was not mediated by increased phosphorylation (Figure 4B). The nature of this posttranslational modification is not known; however, it was blocked by MG-132 (Figure 4E), indicating that it required an active proteasome.

### Reduction of Chromatin Occupancy Provides the Critical Upstream Point of Tcf711 Regulation

To elucidate how the reduction of chromatin occupancy is causally linked to protein degradation, we conducted quantitative chromatin immunoprecipitation (ChIP) experiments to measure Tcf711 chromatin occupancy following the combined CHIR + MG-132 treatment. As expected from the changes in Tcf711 protein levels (Figure 1B), CHIR reduced Tcf711 occupancy on target genes (*Axin2*, *Cdx1*, and *Mycn*), and MG-132 increased occupancy (Figure 4F). Importantly, CHIR treatment reduced chromatin occupancy even when destabilization of Tcf711 was blocked by MG-132 (Figure 4F), indicating the reduction in DNA binding was upstream of degradation. Interestingly, since MG-132 prevented the mobility shift of Tcf711 (Figure 4E), this result also indicates that the reduction of chromatin binding does not require the posttranslational modification. Combined with the increased cytoplasmic Tcf711 staining after CHIR + MG-132 treatment (Figure S3G), these data indicate that Tcf711 is likely degraded after export from the nucleus.

To examine the role of chromatin occupancy in regulating Tcf711 stability, we used the Tcf711 HMG\* mutation, which affects the DNA-binding HMG domain and disrupts DNA binding (Merrill et al., 2001). The HMG\* mutation was sufficient to reduce Tcf711 protein stability in the absence of CHIR (Figure 4G). Moreover, stability of the mutant Tcf711 HMG\* protein was not substantially decreased by CHIR (Figure 4H), indicating that destabilization of Tcf711 requires a change in chromatin occupancy. In support of the model focused on reduction of chromatin occupancy, coimmunoprecipitation (coIP) experiments showed that Tcf711- $\beta$ -catenin interaction was stimulated by CHIR + MG-132 (Figure 4I), and  $\beta$ -catenin chromatin occupancy increased (Figure 4J) while Tcf711 occupancy decreased (Figure 4F). Together, these data are most consistent with the notion that the primary effect of the Tcf711- $\beta$ -catenin interaction is to inhibit chromatin occupancy. The secondary effect of Tcf711 degradation provides an additional mechanism by lowering Tcf711 levels, which further reduces the amount of Tcf711 available to bind to chromatin. Thus, the combination of reduced DNA binding and Tcf711 degradation leads to an additive reduction of Tcf711 repression in response to Wnt/ $\beta$ -catenin activity.

### DISCUSSION

The molecular effects of Wnt/ $\beta$ -catenin and Gsk3 inhibition on Tcf711 described here indicate that Tcf711 primarily functions outside of the classic model of canonical Wnt/ $\beta$ -catenin signaling. In ESCs, inactivation of Tcf711 did not require phosphorylation of Tcf711 at conserved sites, and  $\beta$ -catenin was sufficient to reduce Tcf711 levels without exogenous pathway stimulation. These results are consistent with a mechanism of

inactivation wherein  $\beta$ -catenin binding inhibits Tcf711-repression by reducing chromatin occupancy, consequently stimulating its degradation. This mechanism provides a simple explanation for the controversial pro-self-renewal effects of the  $\beta$ -catenin $\Delta$ C mutant in ESCs (Kelly et al., 2011; Lyashenko et al., 2011; Wray et al., 2011): the critical effect of inactivating Tcf711 is stimulated by the  $\beta$ -catenin $\Delta$ C form, thus making  $\beta$ -catenin's C-terminal transactivation domain dispensable in ESCs.

Together, the results from experiments using human breast cancer tumors, breast cancer cell lines, and mouse genetics indicate that inactivation of Tcf711 is the predominant mechanism whereby Wnt/ $\beta$ -catenin signaling interacts with this mammalian Tcf/Lef protein. The viability of *Tcf711*- $\Delta$ N mice genetically demonstrates that inactivation of Tcf711 is the only effect of Tcf711- $\beta$ -catenin binding that is required for normal mouse development and life. That said, additional activities downstream of Tcf711- $\beta$ -catenin interaction likely exist. Indeed, reporter gene assays support rare Tcf711- $\beta$ -catenin transactivator activity in some cell types (e.g., 293T, COS7, and human keratinocytes; Merrill et al., 2001; Slyper et al., 2012; Wu et al., 2012a); however, the biological significance of this effect remains to be determined.

Human breast cancer is one important context in which Tcf711-based activation has been suggested (Slyper et al., 2012). Basal subtype tumors are particularly relevant because they have been noted to share a gene-expression signature with ESCs (Ben-Porath et al., 2008) and fetal mammary stem cells (Spike et al., 2012). These tumors, which express high levels of Tcf711 mRNA, have been suggested to arise following reprogramming to an earlier embryonic stage (Mizuno et al., 2010), and thus it is important to understand how Wnt/ $\beta$ -catenin and Tcf711 function. Previous direct experiments showed that ectopic Tcf711 expression and Wnt3a both stimulate xenograft tumor formation, mammosphere formation, and colony formation in Matrigel from breast cancer cell lines (Slyper et al., 2012). Although it is formally possible that Tcf711- $\beta$ -catenin complexes may act as transactivators for a set of target genes critical for breast cancer cells, the data presented here do not support this possibility. Tcf711 displayed only repressor activity in reporter assay experiments, and Tcf711 was degraded following CHIR treatments. We propose two non-mutually-exclusive possibilities: (1) Tcf711 and Wnt/ $\beta$ -catenin signals mediate parallel effects, each stimulating tumor cells, and (2) Tcf711- $\beta$ -catenin complexes have a biochemical activity that is distinct from the classical transactivator activity. The former possibility is supported by the recent demonstration of a Wnt/Gsk3/Slug/Snail signaling axis affecting triple-negative breast cancers (Wu et al., 2012b).

The effects of  $\beta$ -catenin on Tcf711 are most parsimoniously explained by a mechanism of  $\beta$ -catenin directly inhibiting Tcf711 binding to chromatin. Experiments examining the effects of  $\beta$ -catenin on the Tcf/Lef interaction with naked DNA showed little or no effect on binding in vitro, whereas  $\beta$ -catenin interaction significantly affected binding to chromatin by Lef1 (Tutter et al., 2001). Interestingly, mutational analysis of Lef1 indicated that an amino terminal region provides intramolecular inhibition of chromatin binding.  $\beta$ -catenin binding blocks the intramolecular inhibition, thereby stimulating Lef1 binding to chromatin

(Tutter et al., 2001). Although the effect of  $\beta$ -catenin on Lef1 is different from that predicted for Tcf711, these previous findings demonstrate both positive and negative regulation of chromatin binding via the  $\beta$ -catenin interaction region of Tcf/Lef proteins. Further research is necessary to elucidate the biophysical and biochemical nature of  $\beta$ -catenin's effects on the chromatin-binding properties of Tcf711.

## EXPERIMENTAL PROCEDURES

### IHC Staining and Scoring of Mammary Tumor Microarray

Quantitative analysis (i.e., scoring) of IHC was performed without knowledge of specimen identification. Scoring was based on a combination of the intensity of stained cells and the percentage of tissue. Separate values for nuclear and cytoplasmic Tcf711 immunoreactivity were determined for each sample. Total Tcf711 IHC scores were calculated using a modified Reiner scoring system (Reiner et al., 1990) by multiplying the intensity of staining (0–3 value) by the percentage of positive cells. Ranking and scores for  $\beta$ -catenin levels and localization were previously described in Khramtsov et al. (2010).

### Statistical Analyses of Tumor RNA and Protein Expression Data

The Kruskal-Wallis test was used to compare the overall effects of stage on nuclear, cytoplasmic, and total Tcf711. The Wilcoxon rank-sum test with Bonferroni correction was used to conduct pairwise comparisons among four stages. A two-sample t test was used to compare Tcf711 mRNA between basal and nonbasal groups. The Wilcoxon rank-sum test was used to compare Tcf711 nuclear, cytoplasmic, and total IHC scores between basal and nonbasal groups and between luminal A and nonluminal A groups. Spearman correlations determined the relationships between nuclear Tcf711 and cytoplasmic  $\beta$ -catenin; p values < 0.05 were considered statistically significant.

## SUPPLEMENTAL INFORMATION

Supplemental Information includes Extended Experimental Procedures and four figures and can be found with this article online at <http://dx.doi.org/10.1016/j.celrep.2013.06.001>.

## ACKNOWLEDGMENTS

We thank Jackson Hoffman, Yuka Shimizu, and Alan Tseng for helpful discussions and work associated with the manuscript, Weihua Gao at the UIC Center for Clinical and Translational Science (CCTS) for assistance with biostatistical services, Liza Benevolenskaya for assistance with tumor microarray studies, Sergei Sokol for providing the Tcf3-P2/3/4 mutant DNA, and Rudolf Groschedl for providing the  $\beta$ -catenin $\Delta$ C plasmid DNA. This work was funded by grants from the National Institutes of Health (R01-CA128571 to B.J.M. and UL1TR000050 to the UIC CCTS) and the American Cancer Society Illinois Division (215889 to K.H.G.).

Received: March 7, 2013

Revised: May 10, 2013

Accepted: June 2, 2013

Published: June 27, 2013

## REFERENCES

- Aberle, H., Bauer, A., Stappert, J., Kispert, A., and Kemler, R. (1997).  $\beta$ -catenin is a target for the ubiquitin-proteasome pathway. *EMBO J.* 16, 3797–3804.
- Alexander, C.M., Goel, S., Fakhradeen, S.A., and Kim, S. (2012). Wnt signaling in mammary glands: plastic cell fates and combinatorial signaling. *Cold Spring Harb. Perspect. Biol.* 4.
- Ben-Porath, I., Thomson, M.W., Carey, V.J., Ge, R., Bell, G.W., Regev, A., and Weinberg, R.A. (2008). An embryonic stem cell-like gene expression signature in poorly differentiated aggressive human tumors. *Nat. Genet.* 40, 499–507.
- Brannon, M., Gomperts, M., Sumoy, L., Moon, R.T., and Kimelman, D. (1997). A  $\beta$ -catenin/XTCF-3 complex binds to the siamois promoter to regulate dorsal axis specification in *Xenopus*. *Genes Dev.* 11, 2359–2370.
- Cadigan, K.M., and Waterman, M.L. (2012). TCF/LEFs and Wnt signaling in the nucleus. *Cold Spring Harb. Perspect. Biol.* 4, 4.
- Cavallo, R.A., Cox, R.T., Moline, M.M., Roose, J., Polevoy, G.A., Clevers, H., Peifer, M., and Bejsovec, A. (1998). *Drosophila* Tcf and Groucho interact to repress Wingless signalling activity. *Nature* 395, 604–608.
- Clevers, H., and Nusse, R. (2012). Wnt/ $\beta$ -catenin signaling and disease. *Cell* 149, 1192–1205.
- Daniels, D.L., and Weis, W.I. (2005).  $\beta$ -catenin directly displaces Groucho/TLE repressors from Tcf/Lef in Wnt-mediated transcription activation. *Nat. Struct. Mol. Biol.* 12, 364–371.
- Filali, M., Cheng, N., Abbott, D., Leontiev, V., and Engelhardt, J.F. (2002). Wnt-3A/ $\beta$ -catenin signaling induces transcription from the LEF-1 promoter. *J. Biol. Chem.* 277, 33398–33410.
- Geyer, F.C., Lacroix-Triki, M., Savage, K., Arnedos, M., Lambros, M.B., MacKay, A., Natrajan, R., and Reis-Filho, J.S. (2011).  $\beta$ -Catenin pathway activation in breast cancer is associated with triple-negative phenotype but not with CTNNB1 mutation. *Mod. Pathol.* 24, 209–231.
- Hart, M., Concordet, J.P., Lassot, I., Albert, I., del los Santos, R., Durand, H., Perret, C., Rubinfeld, B., Margottin, F., Benarous, R., and Polakis, P. (1999). The F-box protein  $\beta$ -TrCP associates with phosphorylated  $\beta$ -catenin and regulates its activity in the cell. *Curr. Biol.* 9, 207–210.
- Hikasa, H., and Sokol, S.Y. (2011). Phosphorylation of TCF proteins by homeodomain-interacting protein kinase 2. *J. Biol. Chem.* 286, 12093–12100.
- Hikasa, H., Ezan, J., Itoh, K., Li, X., Klymkowsky, M.W., and Sokol, S.Y. (2010). Regulation of TCF3 by Wnt-dependent phosphorylation during vertebrate axis specification. *Dev. Cell* 19, 521–532.
- Hoffman, J.A., Wu, C.I., and Merrill, B.J. (2013). Tcf711 prepares epiblast cells in the gastrulating mouse embryo for lineage specification. *Development* 140, 1665–1675.
- Hovanes, K., Li, T.W., and Waterman, M.L. (2000). The human LEF-1 gene contains a promoter preferentially active in lymphocytes and encodes multiple isoforms derived from alternative splicing. *Nucleic Acids Res.* 28, 1994–2003.
- Ishitani, T., Ninomiya-Tsuji, J., Nagai, S., Nishita, M., Meneghini, M., Barker, N., Waterman, M., Bowerman, B., Clevers, H., Shibuya, H., et al. (1999). The TAK1-NLK-MAPK-related pathway antagonizes signalling between  $\beta$ -catenin and transcription factor TCF. *Nature* 399, 798–802.
- Ishitani, T., Ninomiya-Tsuji, J., and Matsumoto, K. (2003). Regulation of lymphoid enhancer factor 1/T-cell factor by mitogen-activated protein kinase-related Nemo-like kinase-dependent phosphorylation in Wnt/ $\beta$ -catenin signaling. *Mol. Cell. Biol.* 23, 1379–1389.
- Ivanova, N.B., Dimos, J.T., Schaniel, C., Hackney, J.A., Moore, K.A., and Lemischka, I.R. (2002). A stem cell molecular signature. *Science* 298, 601–604.
- Kelly, K.F., Ng, D.Y., Jayakumaran, G., Wood, G.A., Koide, H., and Doble, B.W. (2011).  $\beta$ -catenin enhances Oct-4 activity and reinforces pluripotency through a TCF-independent mechanism. *Cell Stem Cell* 8, 214–227.
- Khramtsov, A.I., Khramtsova, G.F., Tretiakova, M., Huo, D., Olopade, O.I., and Goss, K.H. (2010). Wnt/ $\beta$ -catenin pathway activation is enriched in basal-like breast cancers and predicts poor outcome. *Am. J. Pathol.* 176, 2911–2920.
- Li, V.S., Ng, S.S., Boersema, P.J., Low, T.Y., Karthaus, W.R., Gerlach, J.P., Mohammed, S., Heck, A.J., Maurice, M.M., Mahmoudi, T., et al. (2012). Wnt signaling through inhibition of  $\beta$ -catenin degradation in an intact Axin1 complex. *Cell* 149, 1245–1256.
- López-Knowles, E., Zardawi, S.J., McNeil, C.M., Millar, E.K., Crea, P., Musgrove, E.A., Sutherland, R.L., and O'Toole, S.A. (2010). Cytoplasmic localization of  $\beta$ -catenin is a marker of poor outcome in breast cancer patients. *Cancer Epidemiol. Biomarkers Prev.* 19, 301–309.



- Lyashenko, N., Winter, M., Migliorini, D., Biechele, T., Moon, R.T., and Hartmann, C. (2011). Differential requirement for the dual functions of  $\beta$ -catenin in embryonic stem cell self-renewal and germ layer formation. *Nat. Cell Biol.* **13**, 753–761.
- Merrill, B.J., Gat, U., DasGupta, R., and Fuchs, E. (2001). Tcf3 and Lef1 regulate lineage differentiation of multipotent stem cells in skin. *Genes Dev.* **15**, 1688–1705.
- Merrill, B.J., Pasolli, H.A., Polak, L., Rendl, M., García-García, M.J., Anderson, K.V., and Fuchs, E. (2004). Tcf3: a transcriptional regulator of axis induction in the early embryo. *Development* **131**, 263–274.
- Mizuno, H., Spike, B.T., Wahl, G.M., and Levine, A.J. (2010). Inactivation of p53 in breast cancers correlates with stem cell transcriptional signatures. *Proc. Natl. Acad. Sci. USA* **107**, 22745–22750.
- Molenaar, M., van de Wetering, M., Oosterwegel, M., Peterson-Maduro, J., Godsave, S., Korinek, V., Roose, J., Destree, O., and Clevers, H. (1996). XTcf-3 transcription factor mediates beta-catenin-induced axis formation in *Xenopus* embryos. *Cell* **86**, 391–399.
- Nusse, R. (2012). Wnt signaling. *Cold Spring Harb. Perspect. Biol.* **4**, 4.
- Nusse, R., van Ooyen, A., Cox, D., Fung, Y.K., and Varmus, H. (1984). Mode of proviral activation of a putative mammary oncogene (int-1) on mouse chromosome 15. *Nature* **307**, 131–136.
- Reiner, A., Neumeister, B., Spona, J., Reiner, G., Schemper, M., and Jakesz, R. (1990). Immunocytochemical localization of estrogen and progesterone receptor and prognosis in human primary breast cancer. *Cancer Res.* **50**, 7057–7061.
- Roose, J., Molenaar, M., Peterson, J., Hurenkamp, J., Brantjes, H., Moerer, P., van de Wetering, M., Destree, O., and Clevers, H. (1998). The *Xenopus* Wnt effector XTcf-3 interacts with Groucho-related transcriptional repressors. *Nature* **395**, 608–612.
- Roose, J., Huls, G., van Beest, M., Moerer, P., van der Horn, K., Goldschmeding, R., Logtenberg, T., and Clevers, H. (1999). Synergy between tumor suppressor APC and the beta-catenin-Tcf4 target Tcf1. *Science* **285**, 1923–1926.
- Salomonis, N., Schlieve, C.R., Pereira, L., Wahlquist, C., Colas, A., Zamboni, A.C., Vranizan, K., Spindler, M.J., Pico, A.R., Cline, M.S., et al. (2010). Alternative splicing regulates mouse embryonic stem cell pluripotency and differentiation. *Proc. Natl. Acad. Sci. USA* **107**, 10514–10519.
- Slyper, M., Shahar, A., Bar-Ziv, A., Granit, R.Z., Hamburger, T., Maly, B., Peretz, T., and Ben-Porath, I. (2012). Control of breast cancer growth and initiation by the stem cell-associated transcription factor TCF3. *Cancer Res.* **72**, 5613–5624.
- Spike, B.T., Engle, D.D., Lin, J.C., Cheung, S.K., La, J., and Wahl, G.M. (2012). A mammary stem cell population identified and characterized in late embryogenesis reveals similarities to human breast cancer. *Cell Stem Cell* **10**, 183–197.
- Staal, F.J., Burgering, B.M., van de Wetering, M., and Clevers, H.C. (1999). Tcf-1-mediated transcription in T lymphocytes: differential role for glycogen synthase kinase-3 in fibroblasts and T cells. *Int. Immunol.* **11**, 317–323.
- Stamos, J.L., and Weis, W.I. (2013). The  $\beta$ -catenin destruction complex. *Cold Spring Harb. Perspect. Biol.* **5**, a007898.
- Tumbar, T., Guasch, G., Greco, V., Blanpain, C., Lowry, W.E., Rendl, M., and Fuchs, E. (2004). Defining the epithelial stem cell niche in skin. *Science* **303**, 359–363.
- Tutter, A.V., Fryer, C.J., and Jones, K.A. (2001). Chromatin-specific regulation of LEF-1-beta-catenin transcription activation and inhibition in vitro. *Genes Dev.* **15**, 3342–3354.
- van de Wetering, M., Cavallo, R., Dooijes, D., van Beest, M., van Es, J., Louri, J., Ypma, A., Hursh, D., Jones, T., Bejsovec, A., et al. (1997). Armadillo coactivates transcription driven by the product of the *Drosophila* segment polarity gene dTCF. *Cell* **88**, 789–799.
- Wang, Y., Medvid, R., Melton, C., Jaenisch, R., and Blelloch, R. (2007). DGCR8 is essential for microRNA biogenesis and silencing of embryonic stem cell self-renewal. *Nat. Genet.* **39**, 380–385.
- Waterman, M.L. (2004). Lymphoid enhancer factor/T cell factor expression in colorectal cancer. *Cancer Metastasis Rev.* **23**, 41–52.
- Wray, J., Kalkan, T., Gomez-Lopez, S., Eckardt, D., Cook, A., Kemler, R., and Smith, A. (2011). Inhibition of glycogen synthase kinase-3 alleviates Tcf3 repression of the pluripotency network and increases embryonic stem cell resistance to differentiation. *Nat. Cell Biol.* **13**, 838–845.
- Wu, C.I., Hoffman, J.A., Shy, B.R., Ford, E.M., Fuchs, E., Nguyen, H., and Merrill, B.J. (2012a). Function of Wnt/ $\beta$ -catenin in counteracting Tcf3 repression through the Tcf3- $\beta$ -catenin interaction. *Development* **139**, 2118–2129.
- Wu, Z.Q., Li, X.Y., Hu, C.Y., Ford, M., Kleer, C.G., and Weiss, S.J. (2012b). Canonical Wnt signaling regulates Slug activity and links epithelial-mesenchymal transition with epigenetic Breast Cancer 1, Early Onset (BRCA1) repression. *Proc. Natl. Acad. Sci. USA* **109**, 16654–16659.
- Yost, C., Torres, M., Miller, J.R., Huang, E., Kimelman, D., and Moon, R.T. (1996). The axis-inducing activity, stability, and subcellular distribution of beta-catenin is regulated in *Xenopus* embryos by glycogen synthase kinase 3. *Genes Dev.* **10**, 1443–1454.

## EXTENDED EXPERIMENTAL PROCEDURES

### Luciferase Reporter Assay

Cells were transfected at the time of plating on 24-well plates coated with 0.1% gelatin. They were transfected with Lipofectamine 2000 (Invitrogen) following the manufacturer's protocol. For experiments involving Wnt3a stimulation, Wnt3a conditioned media from transgenic L-cells were added to cells six hours after transfection. Conditioned media from non-transgenic L-cells were used as control. Cells were harvested and lysed in 1x passive lysis buffer (Promega) 30 hr after transfection. Luciferase activity was measured using a Clarity luminometer (Bio-Tek) and a dual luciferase reporter assay system (Promega). Each transfection was carried out in triplicate, and each experiment was repeated at least twice. Relative activity was calculated as the ratio of the firefly Luciferase activity (from the reporter plasmid) compared to *Renilla* luciferase activity (pRL-CMV), which was cotransfected as an internal control.

### Antibodies

Primary antibodies and dilutions for Western Blot were: Tcf711 (1:3000; Merrill lab; [Pereira et al., 2006](#)), Tcf7 (1:1000; Cell Signaling), Lef1 (1:1000; Cell Signaling), Tcf712 (1:3000; Cell Signaling),  $\beta$ -catenin (1:2000; Sigma), active  $\beta$ -catenin (1:1000; Millipore) and tubulin (1:3000; Developmental Studies Hybridoma Bank). Secondary antibodies were horseradish peroxidase-conjugated anti-rabbit and anti-mouse antibodies at 1:3000 dilution (Jackson Laboratory). Signals were detected with ECL Western blotting detection reagents (Amersham Biosciences).

Primary antibodies and dilutions for immunofluorescence were Tcf711 (1:400; Dr. Elaine Fuchs lab)([Merrill et al., 2001](#)), Lef1 (1:50; Cell Signaling),  $\beta$ -galactosidase (1:100; Developmental Studies Hybridoma Bank), and  $\beta$ -catenin (1:200; Sigma). Secondary antibodies, Cy5, FITC and Texas Red-conjugated donkey antibodies (Jackson Labs) were used at 1:100 dilution. All fluorescent images were obtained using a Zeiss LSM 700 confocal microscope system.

### Quantitative RT-PCR

Total RNA was isolated with TRIZOL reagent (Invitrogen), and 3.0  $\mu$ g total RNA of each sample was used as a template for complementary DNA synthesis. Reverse transcription was carried out with oligo-dT primers (0.5 mg/ml) using a SuperScript III First-Strand cDNA Synthesis kit (Invitrogen). Quantitative real-time PCR reactions were carried out with the iTaq SYBR Green Supermix (BioRad) and iCycler apparatus (BioRad). Amplification was achieved by the following protocol: 1  $\times$  95°C for 2 min; 40  $\times$  95°C for 30 s; 60°C for 30 s. To identify potential amplification of contaminating genomic DNA, control reactions using mock cDNA preparations lacking reverse transcriptase were run in parallel for each analysis. To ensure specificity of PCR, melt-curve analyses were carried out at the end of all PCR reactions. The relative amount of target cDNA was determined from the appropriate standard curve and divided by the amount of GAPDH cDNA present in each sample for normalization. All PCRs had an efficiency of 85% or higher. Each sample was analyzed in duplicate, and the results were expressed as s.e.m.  $\pm$  standard deviations. Primer sequences used for qPCR are: mGAPDH (TGAAGCAGGCATCTGAGGG, CGAAGGTGGAAGAGTGGGAG), mTcf7 (CCAGTGTGCACCCTTCCTAT, AGCCCCACA GAGAACTGAA), mTcf711 (CCCCCTACTTTCCAGCTAC, CTTTGTGTTTCCCCCTTCCT), mTcf712 (ATAAAACCCAGATGCCACCA, CACACGGTCAGTCCATGTTT), mLef1 (CTGCCCTGTGAAGTGCTGA, AATGAACTGCAAACGGGTTT), hGAPDH (GGCCTCCAAG GAGTAAGACC, AGGGGTCTACATGGCAACTG) hTcf711 (CTCTGTCTCTGCCAGTGT, TTGGGAGGAAACCATTTCAG).

### Quantitative Chromatin Immunoprecipitation

Chromatin immunoprecipitation was performed as described previously ([Yi et al., 2011](#)). Briefly, 2  $\times$  10<sup>7</sup> ESCs were cultured and processed for each ChIP experiment. Sonication was carried out on ice by using a Branson digital sonifier (Model 450) for 20  $\times$  30 s pulses (60 s pause between pulses) at 60% amplitude. The resulting chromatin contained DNA fragments with an average size of 500 bp. Chromatin was immunoprecipitated overnight at 4°C using magnetic beads (Protein G Dynabeads, Invitrogen) that had been pre-incubated with 5  $\mu$ g of the Tcf711 antibody ([Pereira et al., 2006](#)). Following phenol-chloroform extraction and ethanol precipitation, DNA was dissolved in 200  $\mu$ l TE (10 mM Tris, 1 mM EDTA). For each qPCR reaction, 5  $\mu$ l of DNA sample was used. Total lysate from each treatment was divided into 5 replicates, which were processed independently. Experimental error between replicates from the same treatment was determined by calculating the average deviation for all examined sequences. This number was used to normalize individual measurements within each sample. DNA oligo sequences used for qPCR reactions are: Axin2 (GAGCGCTCTGTGATTGG, GACCCACCTTTTACAGCAA), Cdx1 (AAGGAGACAAATTGCCGCCCT, CCCGTTTGAAGTCAGCC TTGC), Mycn (TCCCATCTGTCCCCGAATGC, TTTGGAAGAGGCCAGGGGTG).

### Quantitative Immunofluorescence

ES cells were cultured in 15 mm diameter microscope cover glass (Fisher Scientific, 12-545-83) coated with 15  $\mu$ g/ml human plasma fibronectin (Millipore, FC010) and transfected with Lipofectamine 2000 (Invitrogen) following the manufacturer's protocol. Cells were fixed for 8-10 min at room temperature with freshly prepared 4% paraformaldehyde dissolved in 1X PBS, and process for immunofluorescent staining. All fluorescent images were taken with a Zeiss LSM 700 confocal microscope system. Different sample images of the same antigen were acquired under constant acquisition settings. Grayscale images of individual fluorescence channels were imported into ImageJ software (<http://rsbweb.nih.gov/ij/>) for measurement of Tcf711 immunofluorescence. Nuclear areas were

individually selected using freehand selection tool. The mean gray value for each fluorescence channel was determined for each nucleus using ROI manager function of ImageJ. Tcf711 immunofluorescence intensity was measured in non-transfected cells for each treatment to ensure the Tcf711 immunofluorescence staining intensity was comparable between different experiments. 200 cells were examined for each condition in each experiment. Each experiment was performed at least twice through independent transfections.

### siRNA Downregulation of Tcf711

Stealth siRNA duplexes (Invitrogen) designed against mouse Tcf711 (TCF711MSS238262:5'-GGAAGAAAGUGGCACAACCCUGUCAA-3', TCF711MSS277861:5'-CAAGGACACAAGGUCGCCAUCUCCA) or a control siRNA (5'-GGAAGACUAGAGGCGGUGAUGAGUU-3') were used to specifically downregulate Tcf711 mRNA expression levels. For transfection, ESCs were trypsinized and resuspended in media without antibiotics. For each experiment, 100,000 cells per well were combined with Lipofectamine 2000 transfection complexes of control or Tcf711 siRNA (0.04, 0.2, 1 and 5nM) following the manufacturer's protocol (Invitrogen) and plated on gelatin in a 24-well dish.

### $\beta$ -Galactosidase Staining of Mouse Tissue

Embryos were dissected in 1x PBS and pre-fix for 20 min in 4% paraformaldehyde in PBS at 4°C. The embryos were washed five times in 1x PBS and then stained in X-Gal stain solution (100 mM Na Phosphate pH 7.3, 1.3 mM MgCl<sub>2</sub>, 3 mM K<sub>3</sub>Fe(CN)<sub>6</sub>, 3 mM K<sub>4</sub>Fe(CN)<sub>6</sub>, 1 mg/ml X-Gal, 0.1% Na deoxycholate, and 0.2% NP40). Staining was performed in the dark at 37°C for 2-3 hr. After staining, the embryos were post-fixed in 4% paraformaldehyde at 4°C overnight.

Frozen 8  $\mu$ m-thick sections of tissue were fixed with 0.5% glutaraldehyde for two minutes. After washing 7-8 times in 1x PBS, slides were then transferred into X-Gal stain solution without detergent. Staining was performed in the dark at 37°C for 30 min and, after mounting in 80% glycerol, images were taken with a Zeiss Axiovert 200M inverted microscope.

### Composition, Immunohistochemistry, Staining, and Scoring of Mammary Tumor Microarray

Construction and composition of the progression-based TMA was previously described (Khramtsov et al., 2010). Breast cancer subtypes were previously determined by the expression of immunohistochemical markers and defined as luminal A (ER<sup>+</sup> and/or PR<sup>+</sup>, HER2<sup>-</sup>), luminal B (ER<sup>+</sup> and/or PR<sup>+</sup>, HER2<sup>+</sup>), basal-like (ER<sup>-</sup>, PR<sup>-</sup>, HER2<sup>-</sup>, cytokeratin 5/6<sup>+</sup> and/or epidermal growth factor receptor (EGFR)<sup>+</sup>), HER2<sup>+</sup> (HER2<sup>+</sup>, ER<sup>-</sup>, PR<sup>-</sup>), or unclassified (negative for all five markers) according to Perou et al. (Perou et al., 2000). Subtyping was previously confirmed by mRNA-expression profiling in a subset of specimens (Hu et al., 2006).

Four micrometer thick TMA sections were deparaffinized and rehydrated in through graded alcohols. Endogenous peroxidases were blocked with 0.3% hydrogen peroxide; non-specific staining was prevented by incubation in Protein Block Serum-free Solution (Dako, Carpinteria, CA). IHC assays were performed using a Dako immunostainer and affinity purified Tcf711-specific antisera (Pereira et al., 2006) at 1:200 dilution overnight at 4°C. Immunoreactivity was detected using Envision+ reagents (Dako) and 3-3'-diaminobenzidine as the chromogen. Slides were counterstained with hematoxylin and mounted. Human tonsil, breast tissue, and commercially available cell lines were used as controls. No primary antibody was used as a negative control.

For graphs in supplementary figures (Figures S3C and S3D), TCF7L1 IHC scores were binned in to ranks as follows: rank 0 = 0 to 10 TCF7L1 IHC score, rank 1 = 11 to 100 TCF7L1 IHC score, rank 2 = 101 to 200 TCF7L1 IHC score, and rank 3 = higher than 200 TCF7L1 IHC score. TCF7L1 IHC scores for nuclear and cytoplasmic staining were used to classify invasive tumors as displaying nuclear, diffuse or low TCF7L1 protein as follows: Low TCF7L1 for tumors with TCF7L1<sub>nuclear</sub> IHC score was zero or TCF7L1<sub>nuclear</sub> IHC score + TCF7L1<sub>cytoplasmic</sub> IHC score was less than ten, Nuclear TCF7L1 if TCF7L1<sub>nuclear</sub> IHC score was greater than TCF7L1<sub>cytoplasmic</sub> IHC score, or Diffuse TCF7L1 if TCF7L1<sub>cytoplasmic</sub> IHC score was greater than TCF7L1<sub>nuclear</sub> IHC score.

### SUPPLEMENTAL REFERENCES

Hu, Z., Fan, C., Oh, D.S., Marron, J.S., He, X., Qaqish, B.F., Livasy, C., Carey, L.A., Reynolds, E., Dressler, L., et al. (2006). The molecular portraits of breast tumors are conserved across microarray platforms. *BMC Genomics* 7, 96.

Pereira, L., Yi, F., and Merrill, B.J. (2006). Repression of Nanog gene transcription by Tcf3 limits embryonic stem cell self-renewal. *Mol. Cell. Biol.* 26, 7479–7491.

Perou, C.M., Sørlie, T., Eisen, M.B., van de Rijn, M., Jeffrey, S.S., Rees, C.A., Pollack, J.R., Ross, D.T., Johnsen, H., Akslén, L.A., et al. (2000). Molecular portraits of human breast tumours. *Nature* 406, 747–752.

Yi, F., Pereira, L., Hoffman, J.A., Shy, B.R., Yuen, C.M., Liu, D.R., and Merrill, B.J. (2011). Opposing effects of Tcf3 and Tcf1 control Wnt stimulation of embryonic stem cell self-renewal. *Nat. Cell Biol.* 13, 762–770.

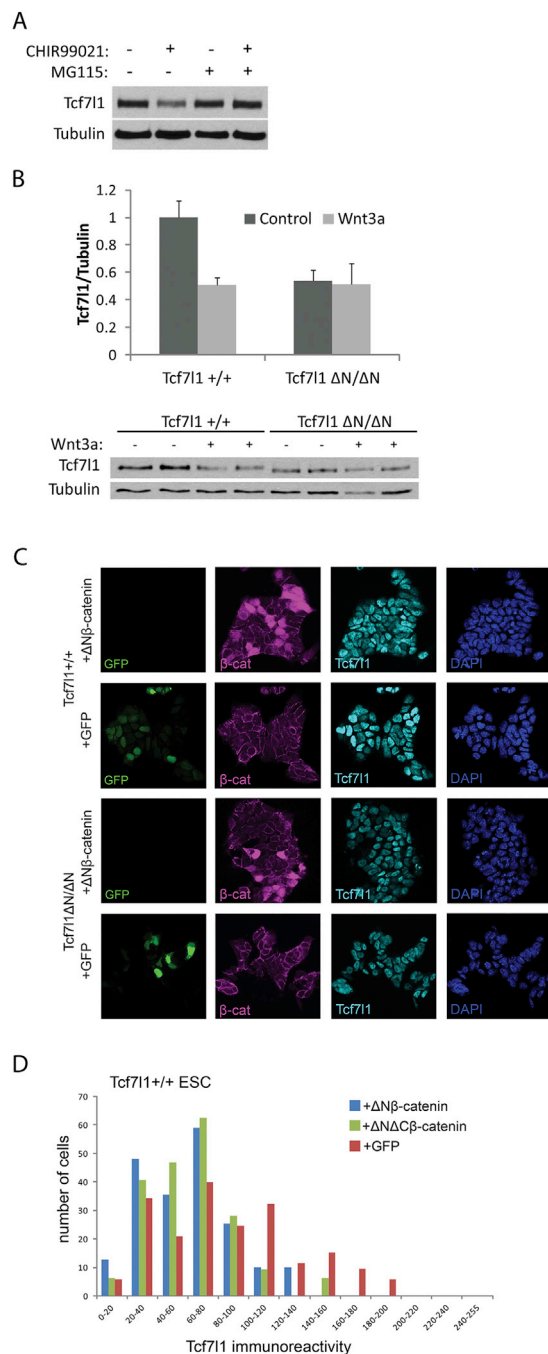

**Figure S1. Wnt/ $\beta$ -Catenin Stimulates Tcf7l1 Protein Degradation, Related to Figure 1**

(A) Western blot analysis of Tcf7l1 protein levels in ESC treated for 6 hr +/- 3  $\mu$ M CHIR and/or 5  $\mu$ M MG115.

(B) Western blot analysis and quantitation of Tcf7l1 protein levels in Tcf7l1  $\Delta$ N/ $\Delta$ N ESC treated for 12 hr +/- 50 ng/mL recombinant Wnt3a. Values represent mean +/- standard deviation for biological triplicates.

(C) Transient transfection of GFP or  $\Delta$ N $\beta$ -catenin expression plasmids was performed in Tcf7l1 +/+ (top) and Tcf7l1  $\Delta$ N/ $\Delta$ N (bottom) ESC. Immunofluorescent detection of Tcf7l1 protein (cyan), GFP (green) or  $\beta$ -catenin (magenta), and DNA (blue) was measured in nuclei of transfected cells. Images were processed for quantitative immunofluorescence to generate data for graphs (Figures 1F and S1D).

(D) Quantitative immunofluorescence for Tcf7l1 protein in ESC transiently transfected with  $\Delta$ N $\beta$ -catenin (blue),  $\Delta$ N $\Delta$ C $\beta$ -catenin (green), or GFP only (red) expression plasmids. Bars indicate number of cells (of a total of 200 counted) display the indicated relative intensity of Tcf7l1 immunoreactivity.



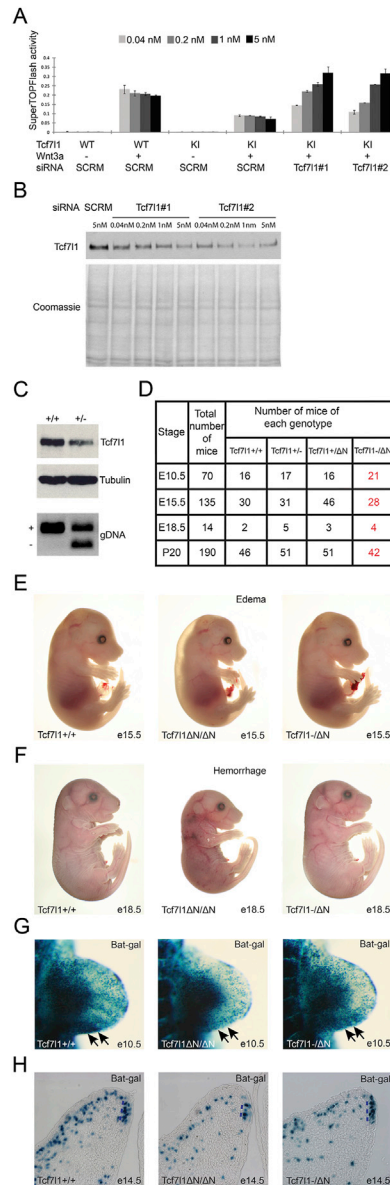

**Figure S2. Reduction of *Tcf711* $\Delta N$  Rescues Wnt Activation, Related to Figure 2**

(A) Transient transfection of *Tcf711*<sup>+/+</sup> (WT) or *Tcf711* $\Delta N/\Delta N$  (KI) ESC with SuperTOPFlash Luciferase reporter and various concentrations (0.04nM to 5nM) of siRNA compounds. Control siRNAs (SCRMs) and two independent *Tcf711*-specific (#1, #2) siRNAs were used. Reporter activity was stimulated by treating with Wnt3a-conditioned media or control conditioned media for 24hrs. Values represent means  $\pm$  standard deviations of biological triplicates.

(B) (top) Western blot showing degree of *Tcf711* protein knockdown caused by siRNA used for reporter assay (A) and (bottom) coomassie stained gel showing even loading of protein lysates samples.

(C) Western blot analysis (top, middle) of whole e8.5 mouse embryos determined to have *Tcf711*<sup>+/+</sup> and *Tcf711*<sup>+/-</sup> genotypes based on PCR genotyping reactions (bottom).

(D) Recovery of offspring with the indicated genotypes from mating *Tcf711*<sup>+/-</sup> and *Tcf711*<sup>+/ $\Delta N$</sup>  mice. Note the normal viability of *Tcf711*<sup>-/ $\Delta N$</sup>  mice.

(E) Images of whole e15.5 embryos of the indicated genotype. Note the lack of edema exhibited by *Tcf711*<sup>-/ $\Delta N$</sup>  mice.

(F) Images of whole e18.5 embryos of the indicated genotype. Note the lack of hemorrhage in the *Tcf711*<sup>-/ $\Delta N$</sup>  mice.

(G and H) BAT-Gal transgenic mice harboring the Tcf/Lef- $\beta$ -catenin reporter transgene were X-gal stained to identify Tcf/Lef- $\beta$ -catenin activity.

(G) In the limb buds of e10.5 embryos, the intense domain of activity at the posterior region (arrows) is absent in *Tcf711* $\Delta N/\Delta N$  embryos and returns in *Tcf711*<sup>-/ $\Delta N$</sup>  embryos.

(H) In 8 $\mu$ m thin cryosections of the eyelids from e14.5 embryos, the domain of BAT-Gal activity at the mucocutaneous junction (dotted line) is reduced in *Tcf711* $\Delta N/\Delta N$  and restored to normal in *Tcf711*<sup>-/ $\Delta N$</sup>  embryos.

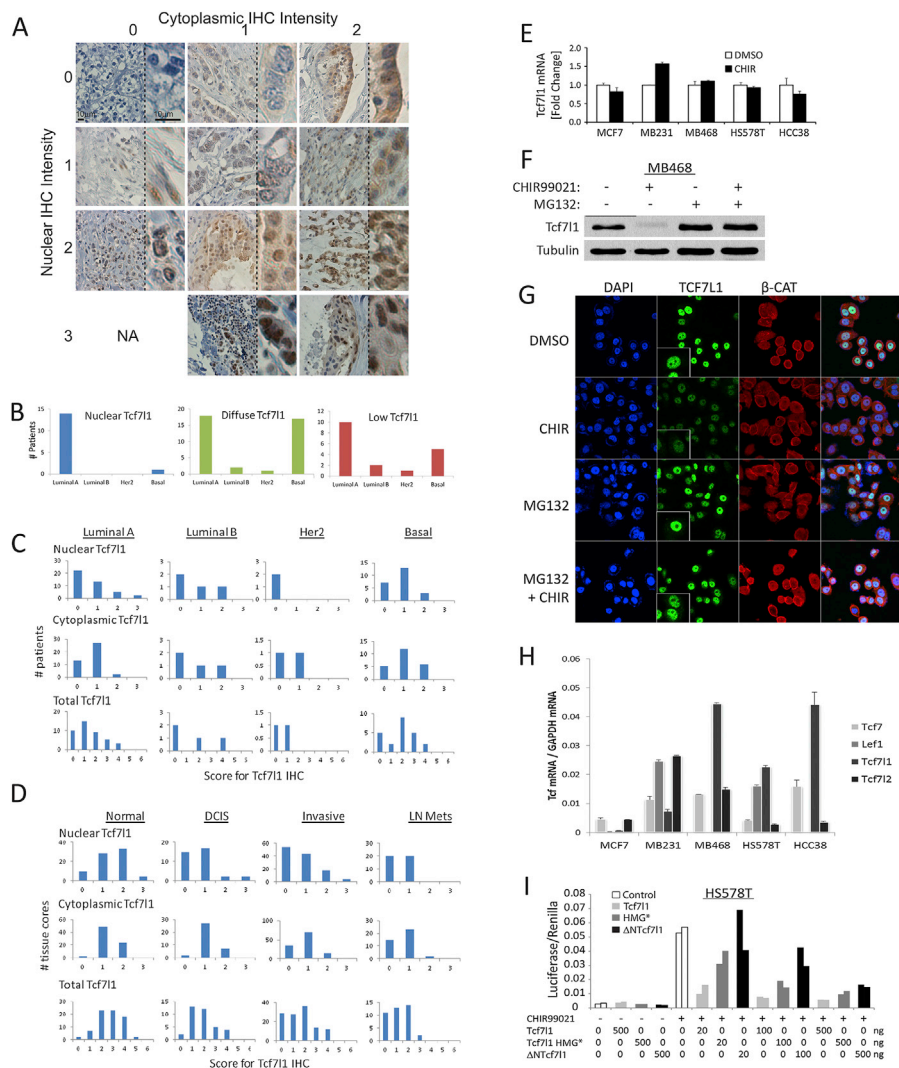

**Figure S3. TCF7L1 Protein Levels Are Reduced by Wnt/ $\beta$ -Catenin in Basal-type Breast Cancer, Related to Figure 3**

(A) Examples of TCF7L1 immunohistochemical staining and scoring of patient samples on the breast cancer tissue microarray. Samples are arranged according to the intensity scores given for nuclear (left) and cytoplasmic (top) staining. Note: none of the patient samples had displayed a staining pattern of 0-cytoplasmic intensity score and 3-nuclear intensity score.

(B) Graphs showing distribution of tumor subtypes with respect to the three classes of TCF7L1 staining (nuclear, diffuse, low). Tumors with primarily nuclear TCF7L1 were Luminal A. Tumors displaying diffuse TCF7L1 were split between Luminal A and Basal subtypes. Tumors with low levels of TCF7L1 protein were distributed among subtypes, with a preference for Luminal A subtype.

(C) Each graph shows the distribution of scores for nuclear TCF7L1 (0-3), cytoplasmic TCF7L1 (0-3), or total TCF7L1 (0-6) for invasive tumors classified as Luminal A, Luminal B, Her2, and Basal subtypes based on marker staining (Khramtsov et al., 2010).

(D) Each graph shows the distribution of scores for nuclear TCF7L1 (0-3), cytoplasmic TCF7L1 (0-3), or total TCF7L1 (0-6) among the four classes of patient samples on the progressive tumor microarray corresponding to: non-tumor tissue (Normal), carcinoma in situ (DCIS), invasive tumor (Invasive), and lymph node metastases (LN Mets). Note high levels of nuclear TCF7L1 (i.e., score of 2 or 3) predominate only in normal tissue.

(E) Quantitative RT-PCR analysis of *TCF7L1* mRNA levels after 12 hr. treatment with 3  $\mu$ M CHIR. Values represent mean  $\pm$  standard deviation for technical duplicates.

(F) Western blot analysis of MB-468 breast cancer cells treated  $\pm$  6  $\mu$ M CHIR and  $\pm$  5  $\mu$ M MG132 for 12 hr.

(G) Immunofluorescence for TCF7L1 (green), total  $\beta$ -catenin (red), and DAPI (blue) in MB-468 breast cancer cells treated  $\pm$  6  $\mu$ M CHIR and  $\pm$  5  $\mu$ M MG132 for 12 hr. TCF7L1 inset shows higher magnification.

(H) qRT-PCR analysis of *TCF/LEF* transcription factor mRNA levels in breast cancer cell lines. *TCF/LEF* mRNA copy numbers were normalized to *GAPDH* mRNA copy numbers. Values represent mean  $\pm$  standard deviation for technical duplicates.

(I) SuperTOPFlash activity was measured after HS-578T breast cancer cells were transiently transfected with 20-500ng of Tcf7l1, Tcf7l1 HMG\*, or Tcf7l1 $\Delta$ N expression plasmids. Biological duplicates are shown as two columns.

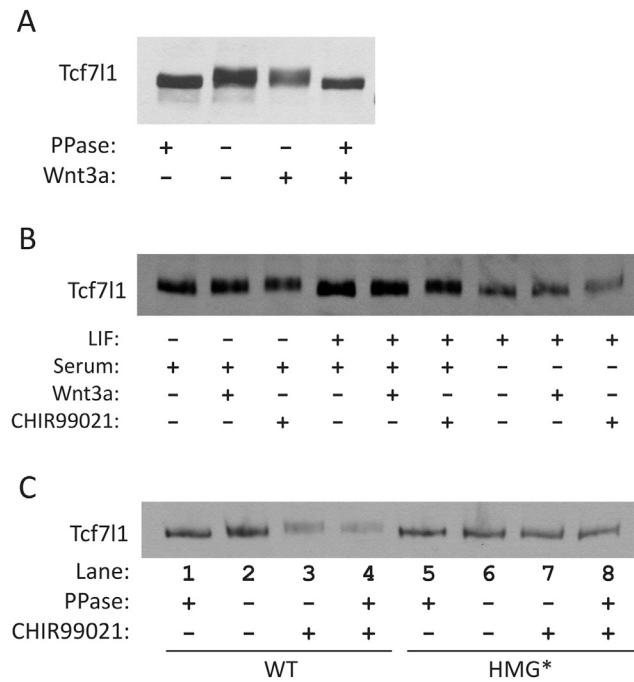

**Figure S4. Posttranslational Modification of Tcf711 in Response to Wnt/ $\beta$ -Catenin and DNA Binding, Related to Figure 4**

(A) Western blot analysis of endogenous Tcf711 from wild-type ESC treated +/- Wnt3a for 12 hr. Lysates were treated +/- 15 U/ $\mu$ L lambda phosphatase for 30 min. Endogenous Tcf711 is phosphorylated both in the presence and absence of Wnt3a and undergoes an upward mobility shift in response to Wnt3a.

(B) Western blot analysis of endogenous Tcf711 from wild-type ESC treated +/- Wnt3a or CHIR for 12 hr. Cells were grown +/- Serum and +/- LIF for 24 hr. Tcf711 mobility on SDS-PAGE is shifted by Wnt3a and CHIR independently of serum or LIF.

(C) Western blot analysis of Tcf711 protein from lysates of *Tcf711*<sup>-/-</sup> ESC stably expressing either wild-type Tcf711 (WT) or the mutant Tcf711 HMG\* (HMG\*) protein. Cells were treated +/- CHIR for 12 hr. Lysates were treated +/- 15 U/ $\mu$ L lambda phosphatase for 30 min. Tcf711 phosphorylation and CHIR induced mobility shift both require DNA binding.
